# Supplementary material for: Development and Validation of Clinical Subphenotypes in Sepsis-Associated Liver Injury Using Multi-Algorithm Consensus Classification: A Retrospective Cohort Study
Source: Research Square preprint supplement (doi:10.21203/rs.3.rs-8049054/v1), 2025-12-08

**Table S Ⅰ. Baseline characteristics of SALI patients across four critical care databases.**


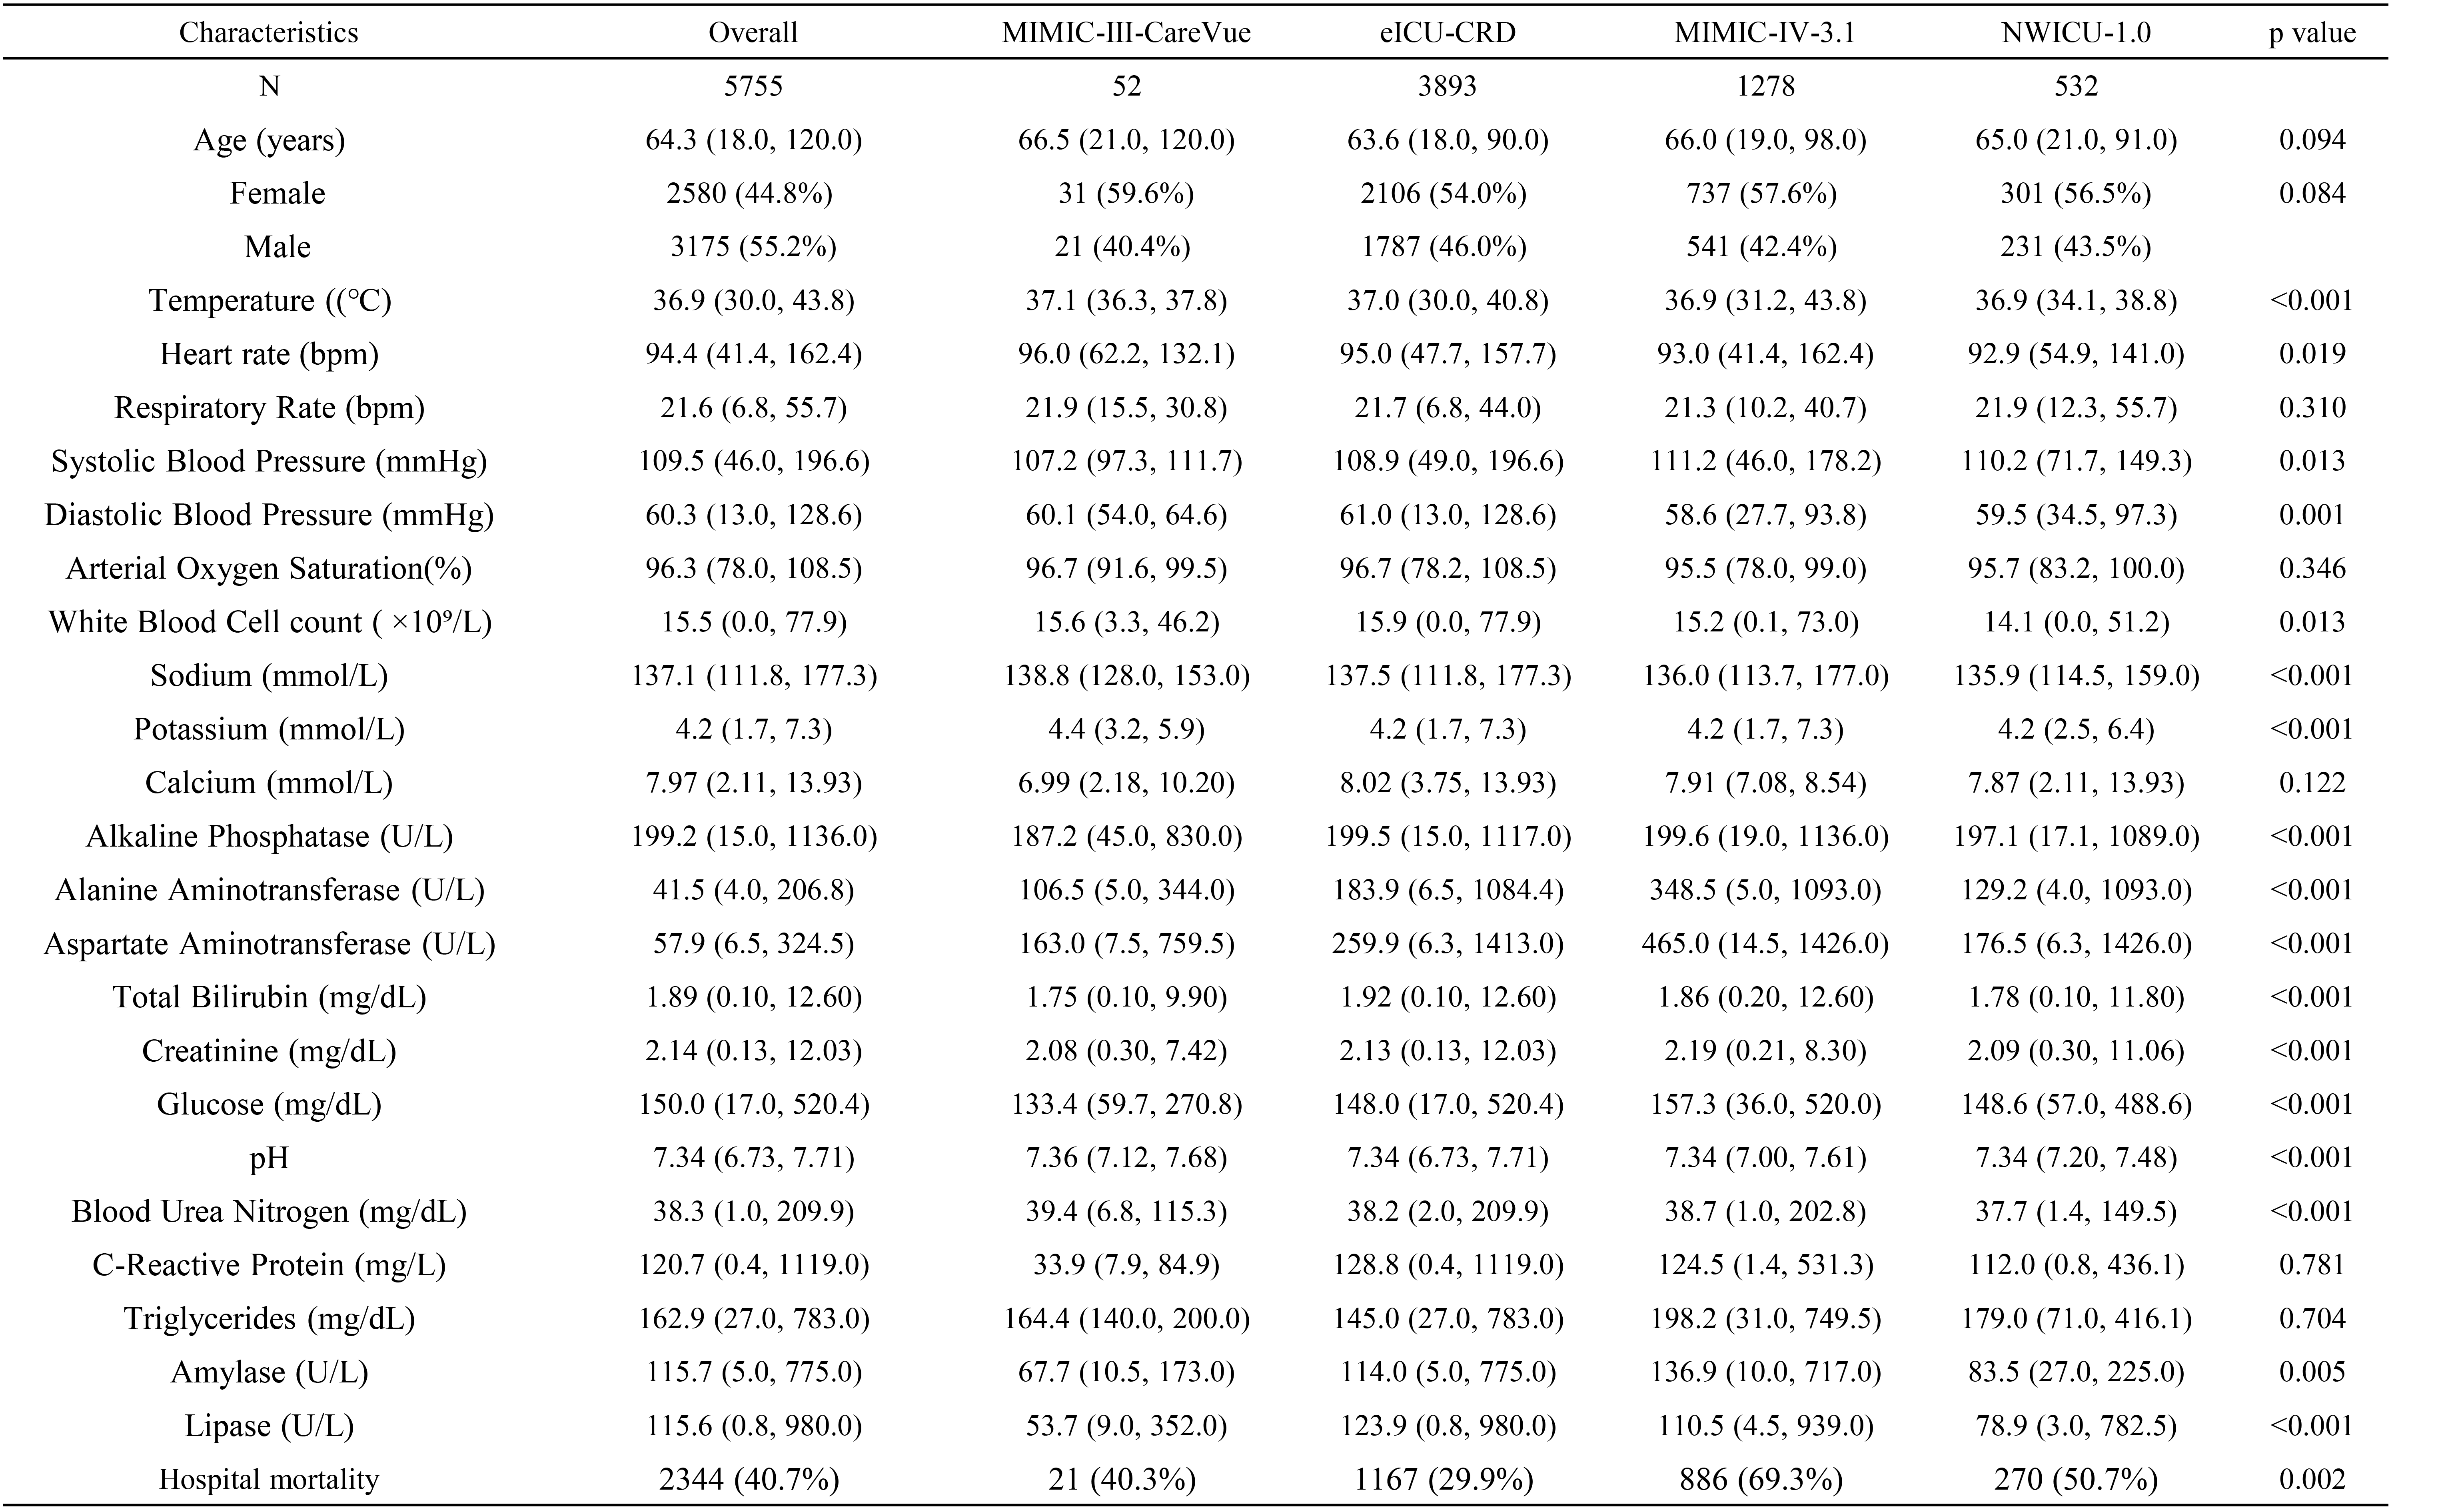
Table SⅡ The clinical characteristics of subphenotypes in development cohort


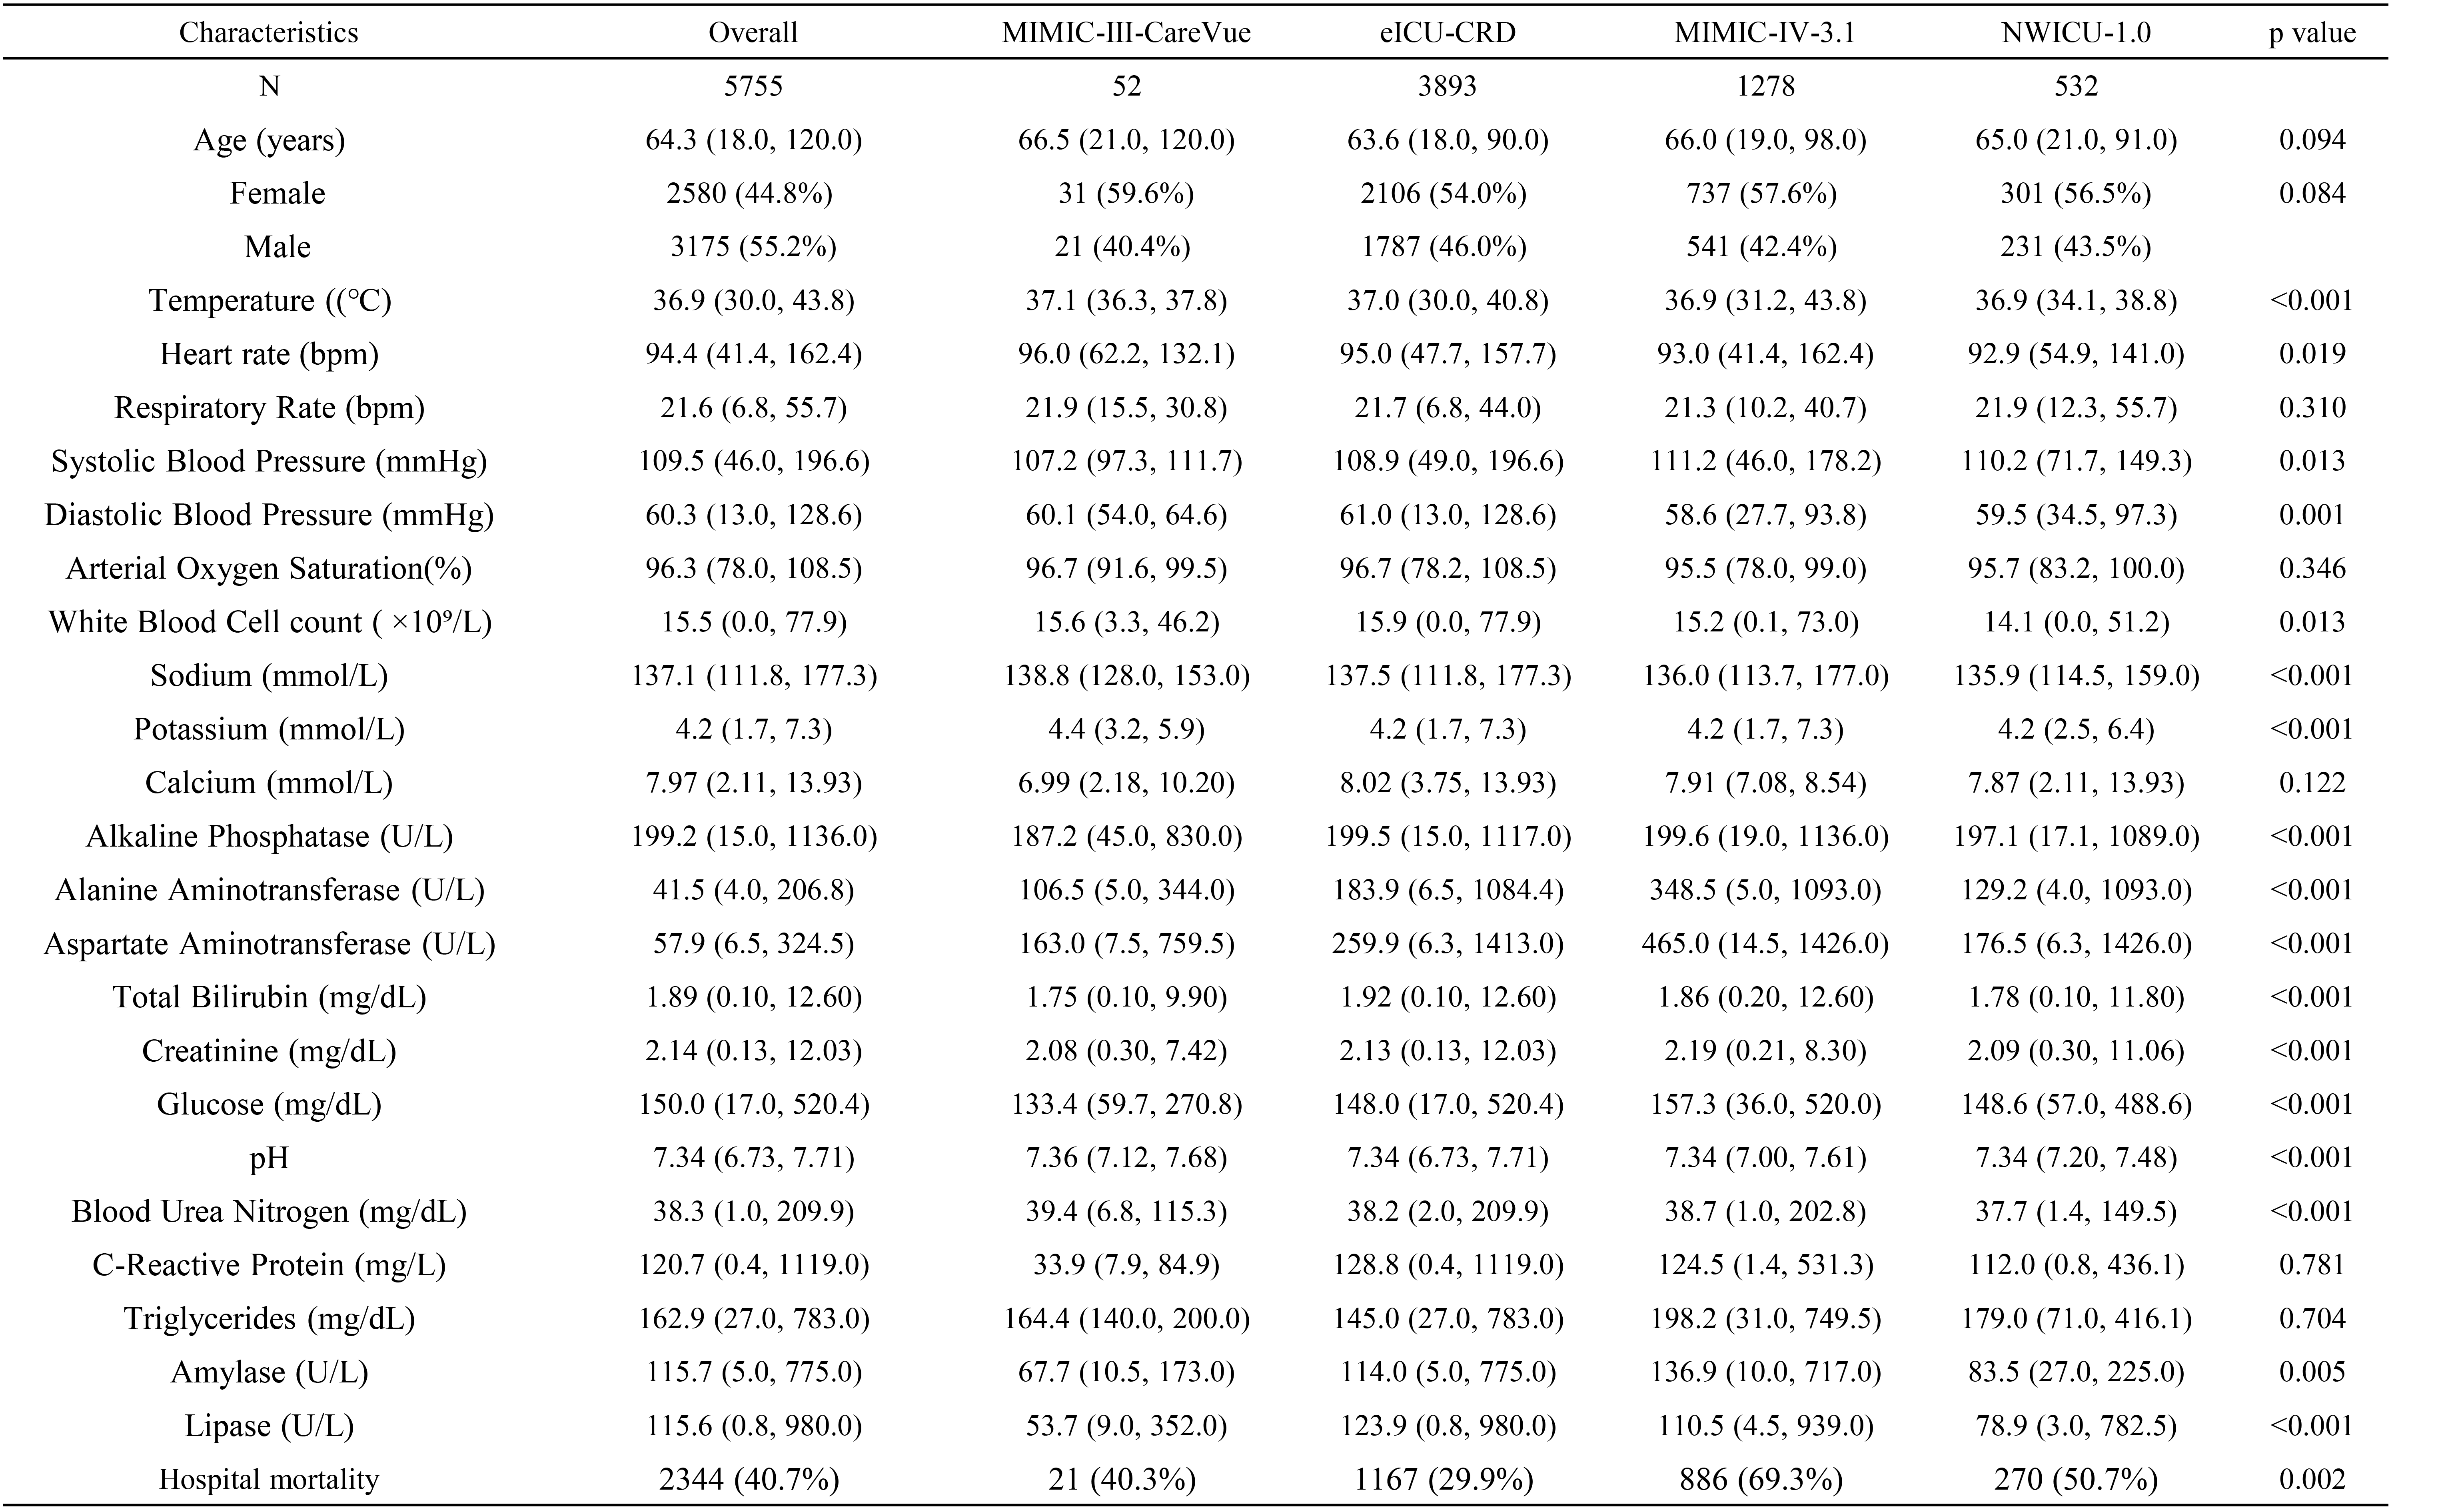


Table SⅢ The clinical characteristics of subphenotypes in validation cohort


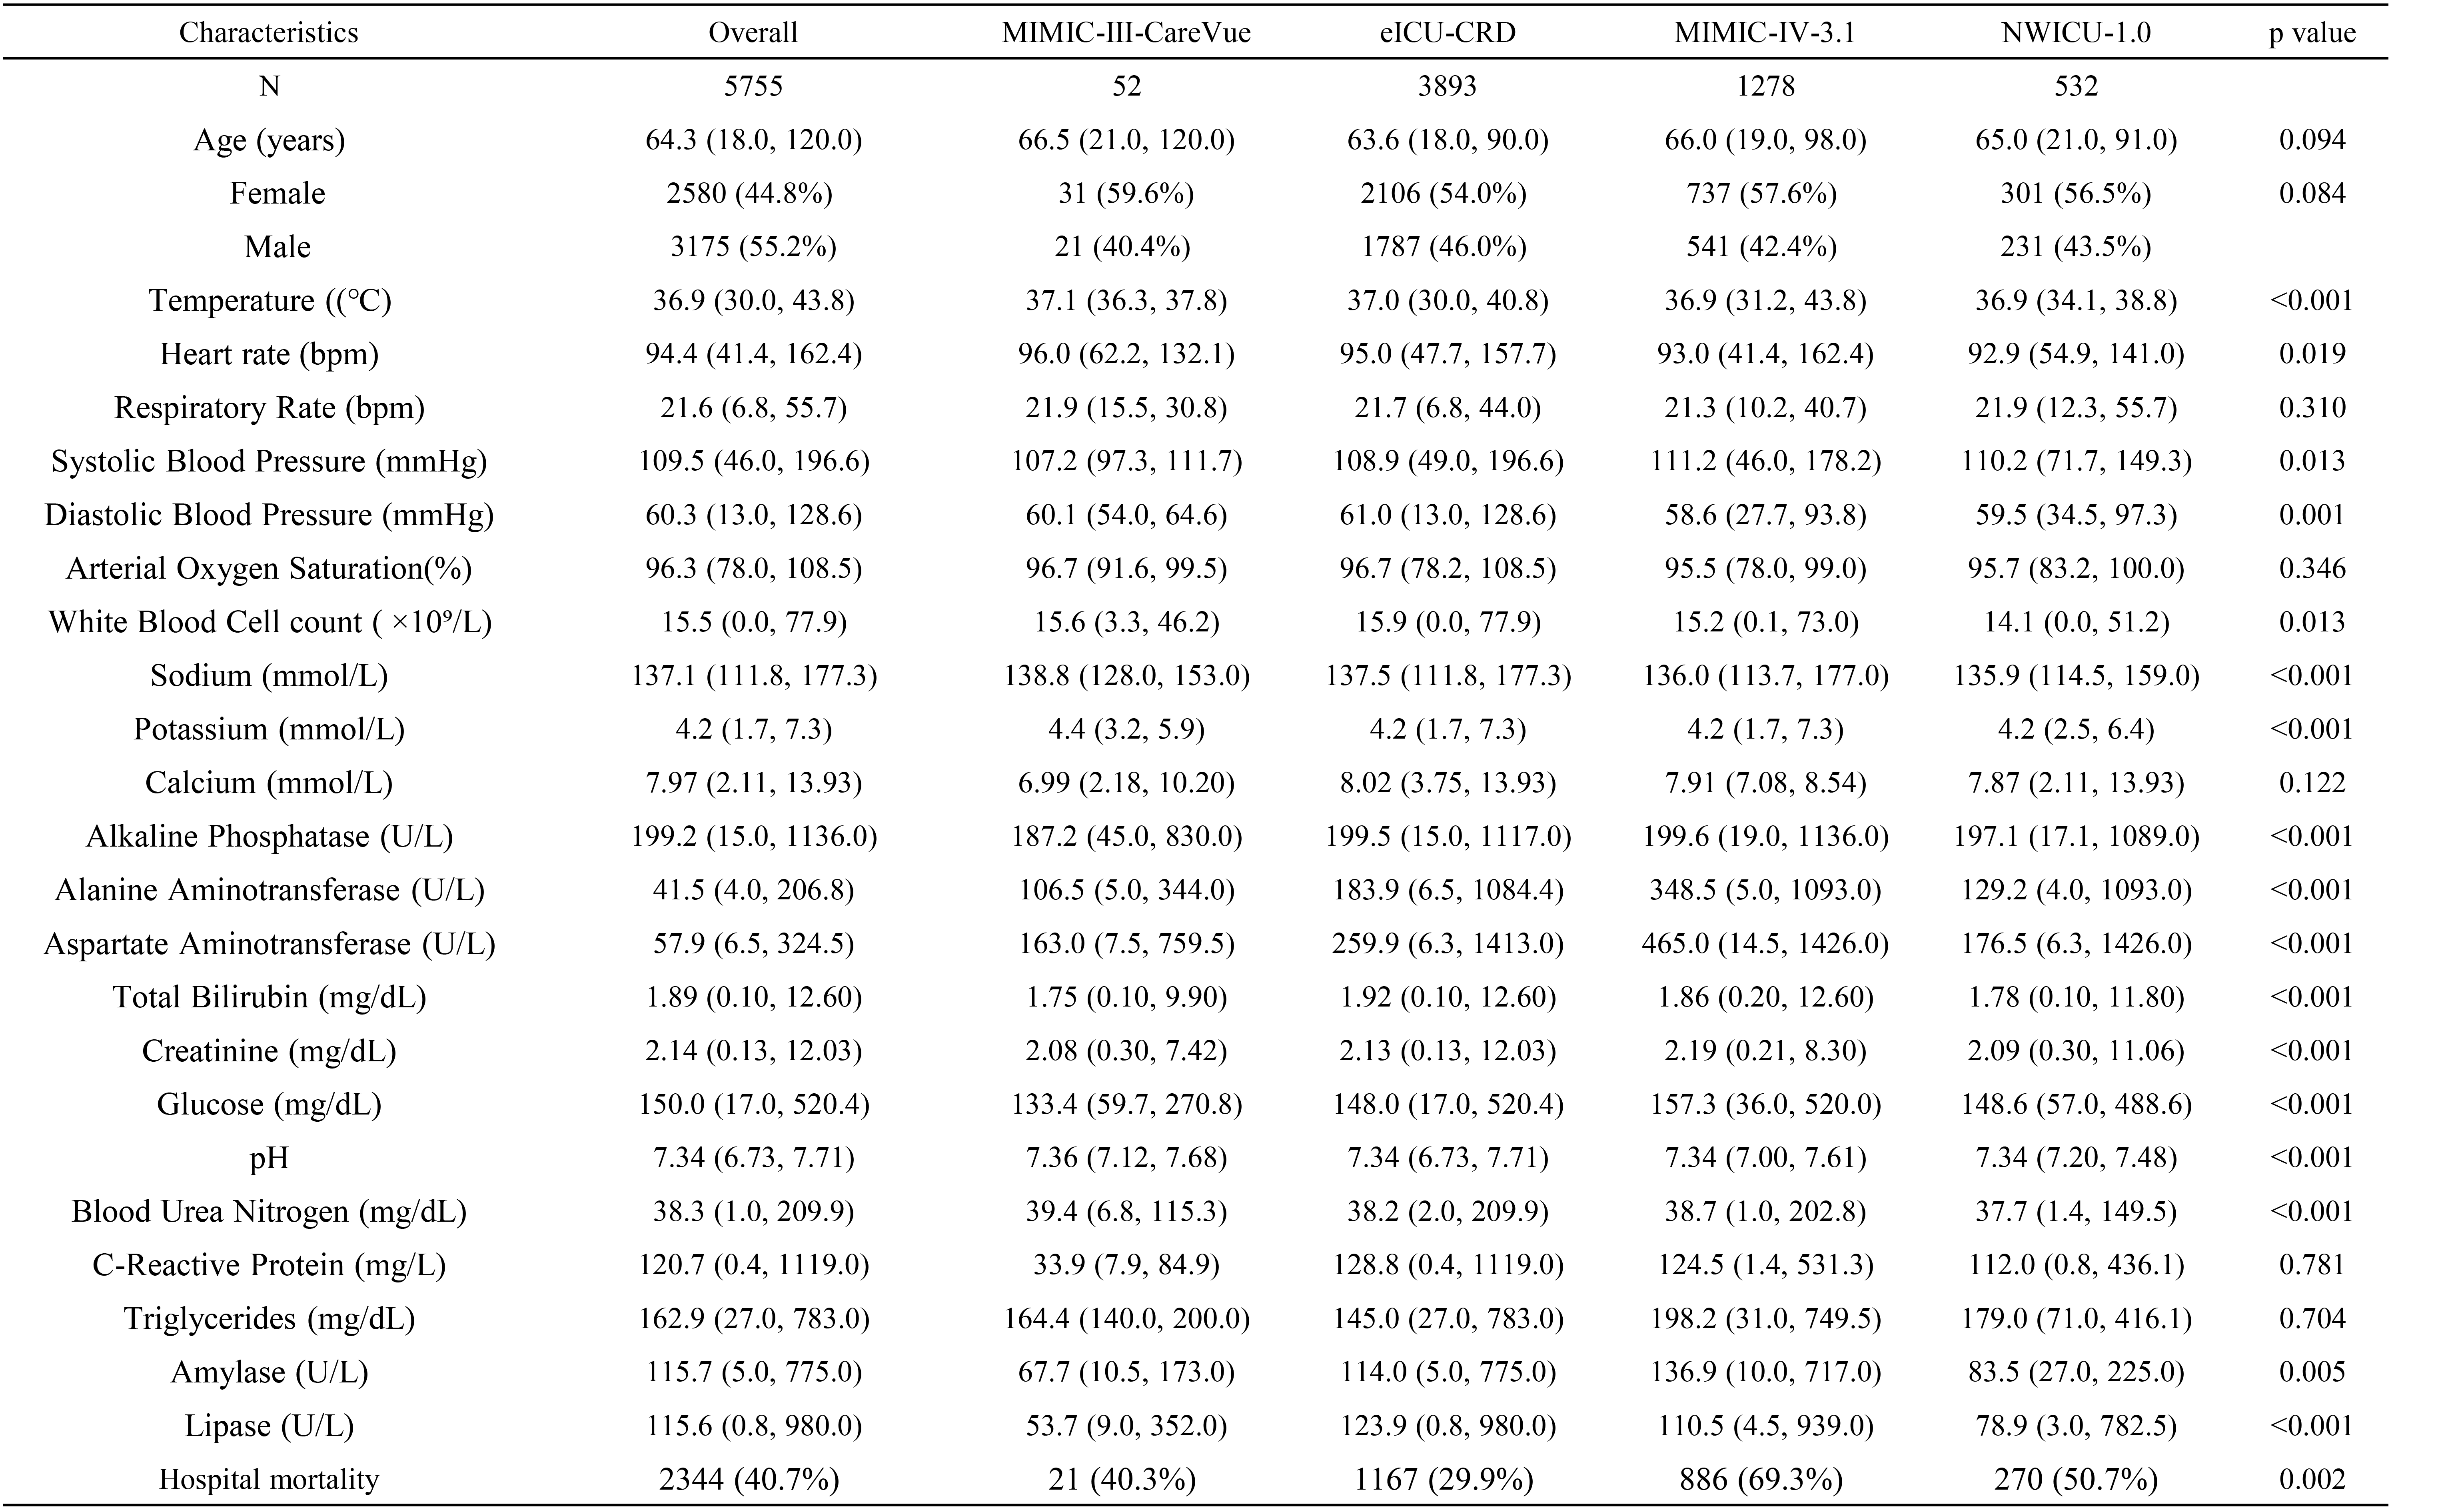

Supplement: Supplementary file 1 [file 0c3640d27a0f7d764f2ee20c.docx]
